# Supplementary material for: Macrophage PPAR gamma Co-activator-1 alpha participates in repressing foam cell formation and atherosclerosis in response to conjugated linoleic acid
Source: PubMed Central journal article supplement (PMC3799497; doi:10.1002/emmm.201302587), 2013-08-21
Supplement: emmm0005-1443-SD2.pdf [file emmm0005-1443-SD2.pdf]

## Supporting Information Table of Contents

### Supplementary Figures and Tables

|            |                                                                                                                                                                                     |    |
|------------|-------------------------------------------------------------------------------------------------------------------------------------------------------------------------------------|----|
| Figure 1:  | Effect of CLA on regression of pre-established atherosclerosis in apoE <sup>-/-</sup> mouse                                                                                         | 3  |
| Figure 2:  | PGC-1 $\alpha$ expression in murine aorta                                                                                                                                           | 4  |
| Table 1:   | Patient clinical data                                                                                                                                                               | 6  |
| Figure 3:  | PGC-1 $\alpha$ target gene expression in human atherosclerosis                                                                                                                      | 7  |
| Table 2:   | Real time PCR CT values                                                                                                                                                             | 8  |
| Figure 4:  | Effect of CLA isomers on adipophilin mRNA expression                                                                                                                                | 9  |
| Table 3:   | Cholesterol uptake in RAW 264.7 macrophages                                                                                                                                         | 10 |
| Figure 5:  | Quantification of cholesterol and triglycerides in CLA-induced regression                                                                                                           | 11 |
| Figure 6:  | Measurement of intracellular Reactive Oxygen Species                                                                                                                                | 12 |
| Figure 7:  | Western blot of PGC-1 $\alpha$ in BMDMs                                                                                                                                             | 12 |
| Figure 8:  | PGC-1 $\alpha$ protein and mRNA expression in peritoneal macrophage-derived foam cells and aorta from LDLR <sup>-/-</sup> mouse                                                     | 13 |
| Figure 9:  | (A) Serum cholesterol and triglyceride levels and (B) En face analysis of aorta from PGC-1 $\alpha$ <sup>+/+</sup> or PGC-1 $\alpha$ <sup>-/-</sup> mice on a high cholesterol diet | 14 |
| Figure 10: | CLA increases AMPK phosphorylation <i>in vivo</i>                                                                                                                                   | 16 |
| Video 1-3: | Legends for Supplementary Video Files 1-3                                                                                                                                           | 17 |

### Supplementary Methods

|                                                                                                |    |
|------------------------------------------------------------------------------------------------|----|
| Immunohistochemical and Western Blot Analysis of Murine Aorta and Human Atherosclerotic Plaque | 19 |
| Quantification of PGC-1 $\alpha$ expression in human atherosclerotic plaque                    | 19 |
| Supplementary Figure 11. Algorithm used in quantification of PGC-1 $\alpha$ expression         | 20 |
| Cell Culture                                                                                   | 21 |
| Primer sequences for real time PCR analysis and PGC-1 $\alpha$ Genotyping                      | 22 |

|                                                           |    |
|-----------------------------------------------------------|----|
| Flow cytometry                                            | 22 |
| Cholesterol Uptake Assay                                  | 23 |
| Cholesterol efflux Assay                                  | 23 |
| Plasma cholesterol, triglyceride and lipoprotein analysis | 24 |

**Figure 1**

A.

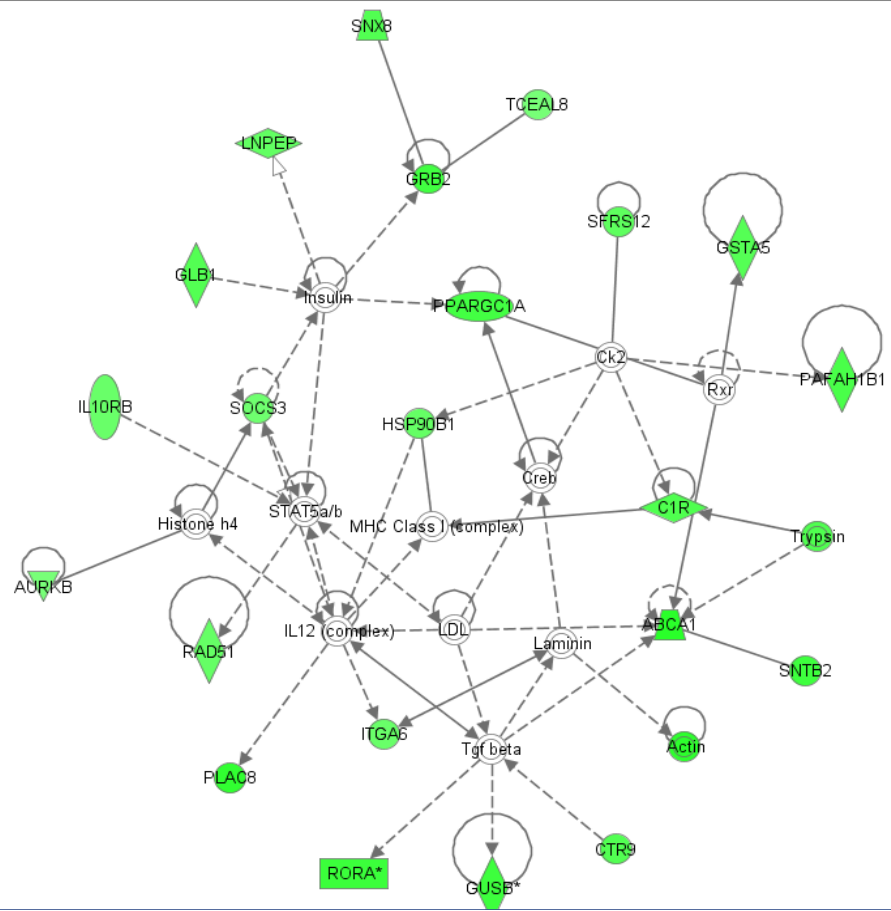

B.

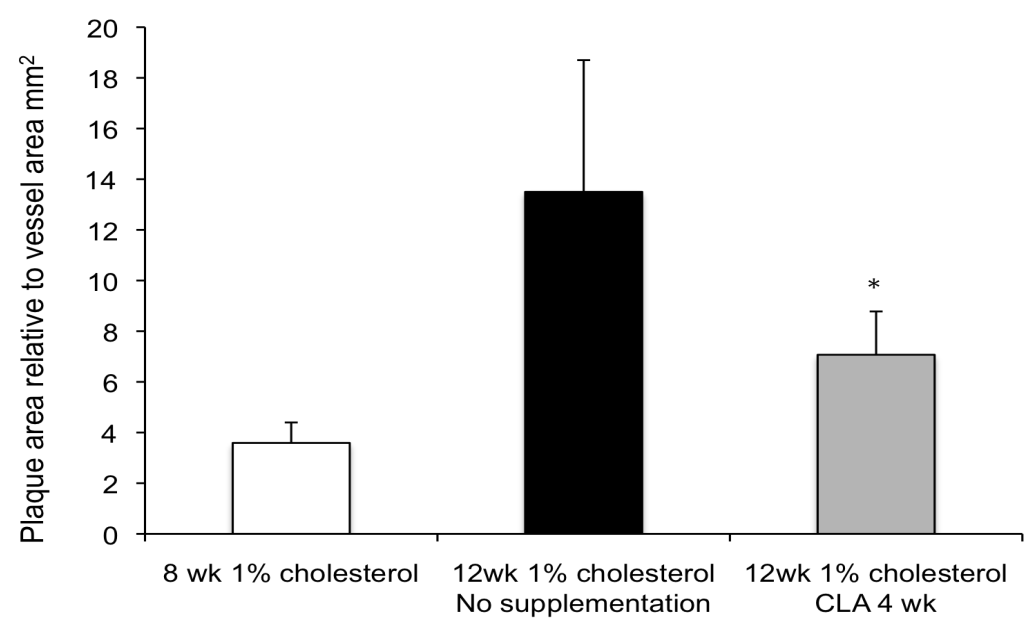

**Supplementary Figure 1. Effect of CLA on regression of pre-established atherosclerosis in apoE<sup>-/-</sup> mouse**

(A) Transcriptomic analysis of murine aorta in CLA-induced regression of atherosclerosis. PGC1- $\alpha$  was identified as a central hub gene located in the network most represented by genes significantly increased (shown in green) with CLA supplementation *in vivo*. (B) Plaque area relative to total aortic area in apoE<sup>-/-</sup> animals fed 1% cholesterol diet for 8 weeks (n=10) (open bars) or 12 weeks (closed bars) and those fed a 1% cholesterol diet for 12 weeks where the final 4 weeks was supplemented with 1% CLA blend (80:20, c-9,t-11: t-10,c-12 CLA) (n=10). Data are mean $\pm$  SEM. Statistical analyses were performed using *t*-test,  $P=0.038$  vs. apoE<sup>-/-</sup> 1% cholesterol diet 12wks.

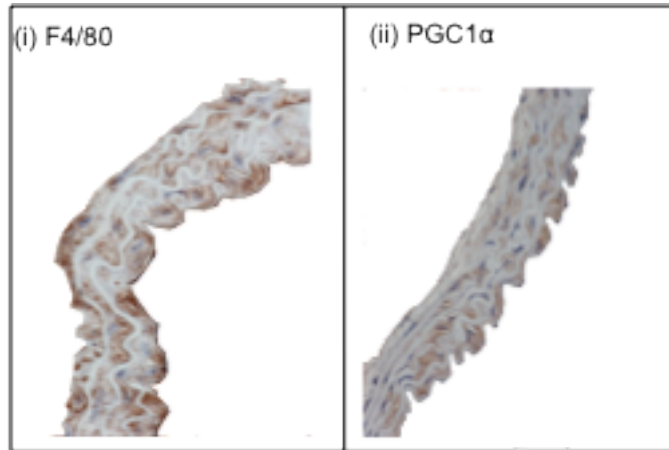

**Supplementary Figure 2.** PGC-1 $\alpha$  expression in aorta of apoE<sup>-/-</sup> fed a CLA supplemented 1% cholesterol chow for 12 weeks (right panel). PGC-1 $\alpha$  was localised to macrophage cells as confirmed by F4/80 staining of aortic tissue (left panel).

Table 1. Patient Characteristics

| GENERAL            |     |     | LIPID PROFILE |              |              |               | STATINS                          | DIABETIC STATUS |               | ANTI-PLATELET THERAPY | SMOKING STATUS |                |                       |
|--------------------|-----|-----|---------------|--------------|--------------|---------------|----------------------------------|-----------------|---------------|-----------------------|----------------|----------------|-----------------------|
| Symptomatic Status | Age | Sex | CHOL (mmol/L) | LDL (mmol/L) | HDL (mmol/L) | Triglycerides | statins/dose                     | Diabetes        | fibrates/dose | Aspirin/dose          | smoking status | cigarettes/day | duration of cessation |
| Asymptomatic       | 60  | F   | 3.8           | Unavailable  | Unavailable  | 0.88          | Atorvastatin (lipitor) / 10mg OD | no              | none          | Aspirin/75mg OD       | ex             | 20-30          | missing               |
| Asymptomatic       | 71  | M   | 5             | 1.14         | 3.57         | 0.64          | Rosuvastatin (crestor) / 10mg OD | no              | none          | None                  | None           | N/A            | N/A                   |
| Asymptomatic       | 49  | M   | 2.9           | 1.68         | 0.57         | 1.42          | Atorvastatin (lipitor) / 40mg OD | no              | none          | Aspirin/75mg OD       | ex             | 30             | 2 months              |
| Asymptomatic       | 72  | M   | 4.8           | 2.77         | 1.07         | 2.12          | None                             | no              | none          | Aspirin/75mg OD       | ex             | unavailable    | 30 years              |
| Asymptomatic       | 66  | M   | 4             | 1.98         | 1.34         | 1.49          | Rosuvastatin (crestor) / 10mg OD | no              | none          | Aspirin/75mg OD       | ex             | unavailable    | 30 years              |
| Symptomatic        | 75  | M   | 5.7           | Unavailable  | Unavailable  | Unavailable   | Atorvastatin (lipitor) / 80mg OD | no              | none          | Aspirin/75mg OD       | None           | NA             | NA                    |
| Symptomatic        | 70  | M   | 2.7           | 0.99         | 1.06         | 1.42          | Atorvastatin (lipitor) / 80mg OD | no              | none          | Aspirin/75mg OD       | ex             | unavailable    | unavailable           |
| Symptomatic        | 63  | M   | 4.4           | 2.44         | 1.67         | 0.06          | Atorvastatin (lipitor) / 40mg OD | no              | none          | Aspirin/75mg OD       | ex             | 15-20          | 5 weeks               |
| Symptomatic        | 78  | F   | 5.4           | 2.52         | 2.71         | 0.38          | Atorvastatin (lipitor) / 20mg OD | no              | none          | Aspirin/75mg OD       | current        | 5              | NA                    |
| Symptomatic        | 83  | M   | 3.7           | Unavailable  | Unavailable  | Unavailable   | Atorvastatin (lipitor) / 10mg OD | no              | none          | None                  | current        | 20             | N?A                   |

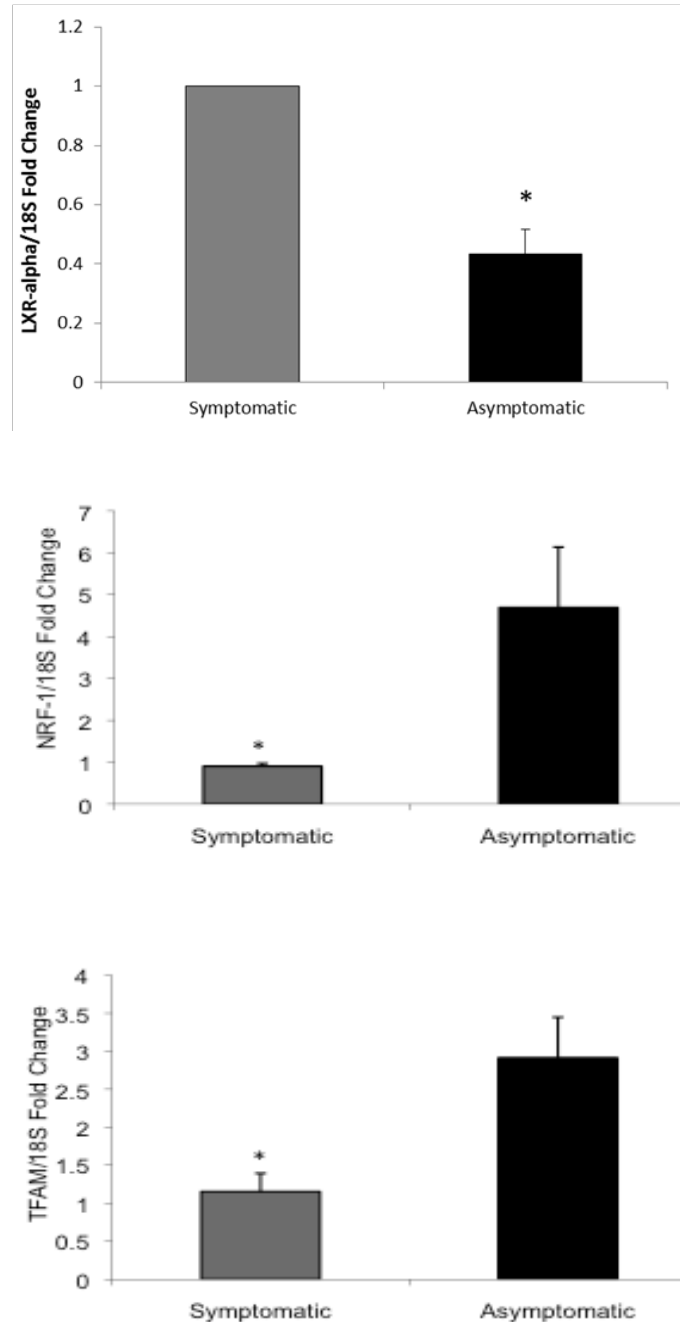

**Supplementary Figure 3. PGC-1  $\alpha$  target gene expression in human atherosclerosis.**

Real time PCR analysis of LXR $\alpha$ , NRF-1 and TFAM mRNA expression in symptomatic and asymptomatic plaques. Data are mean $\pm$  SEM of five independent experiments. Statistical analyses were performed using *t*-test where. Significant *P* values are as follows: *P*=0.033 for LXR $\alpha$  versus symptomatic and *P*=0.021 and 0.033 for NRF-1 and TFAM, respectively, versus asymptomatic plaques.

**Supplementary Table 2: Real Time PCR analysis**

| <b>Gene</b>                                       | <b>CT Value Range</b> |
|---------------------------------------------------|-----------------------|
| <b>RAW 264.7 Macrophage Cells</b>                 |                       |
| 18S Control                                       | 10-11                 |
| Cyp7b1                                            | 24-26                 |
| PPARG                                             | 23-25                 |
| PGC-1a                                            | 17-19                 |
| UCP-1                                             | 32-34                 |
| SRA1                                              | 18-20                 |
| CD36                                              | 22-26                 |
| <b>PGC-1alpha GFP transfected RAW Macrophages</b> |                       |
| 18S                                               | 10-11                 |
| PGC-1 $\alpha$                                    | 26-28                 |
| SRA-1                                             | 17-19                 |
| UCP-1                                             | 24-29                 |
| Cyp7b1,                                           | 26-28                 |
| PPAR $\gamma$ 1                                   | 30-32                 |
| CD36,                                             | 21-23                 |
| <b>Murine Aorta</b>                               |                       |
| 18S                                               | 9-10                  |
| PGC-1 $\alpha$                                    | 23-29                 |
| ROR $\alpha$                                      | 23-25                 |
| Abca1                                             | 21-23                 |
| Cyp7b1                                            | 27-29                 |
| UCP1                                              | 16-18                 |
| PPAR $\gamma$                                     | 22-24                 |
| <b>Human Atherosclerotic Plaque</b>               |                       |
| 18S                                               | 10-12                 |
| PGC-1 $\alpha$                                    | 31-35                 |
| TFAM                                              | 24-28                 |
| NRF-1                                             | 26-29                 |
| LXR- $\alpha$                                     | 21-27                 |
|                                                   |                       |



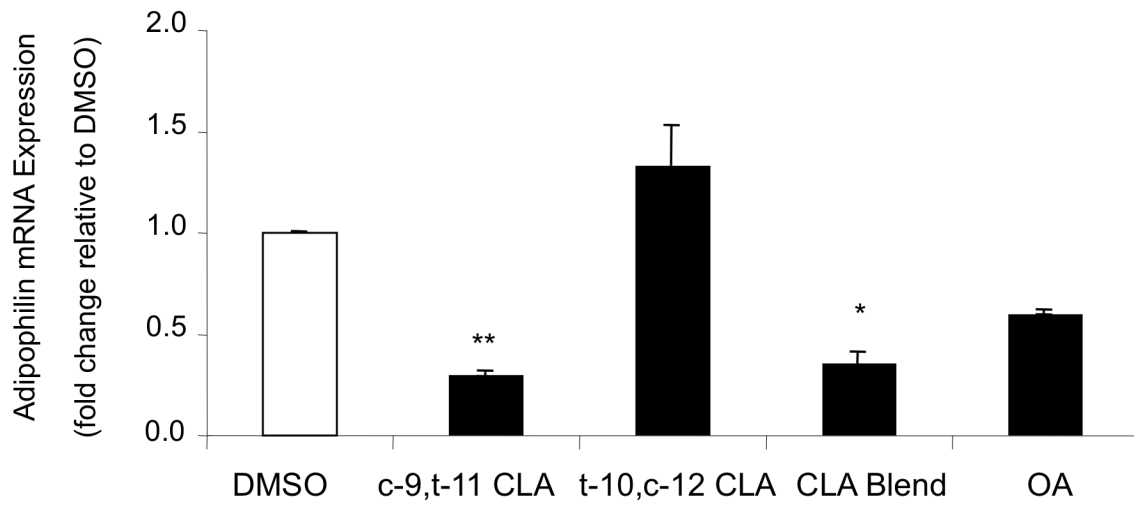

**Supplementary Figure 4. Effect of CLA isomers on adipophilin mRNA expression.**

RAW 264.7 macrophage were pre-treated with (i) DMSO (ii) c-9,t-11-CLA (25  $\mu$ M) (iii) t-10,c-12-CLA(25  $\mu$ M) (iv) CLA blend (80:20 c-9,t-11-CLA: t-10,c-12-CLA) (25  $\mu$ M) and (v) OA (25  $\mu$ M) for 24 hrs prior to ox-LDL treatment (50 ug/ml) for a further 4 hrs.

Real time PCR analysis of Adipophilin mRNA expression, in oxLDL loaded cells following pre-treatment with DMSO, CLA isomers, CLA blend or control OA. Data are mean +/- SEM of 3 independent experiments. Statistical analyses were performed by ANOVA. Significant *P* values from left to right are *P*=0.0091 and 0.017 versus DMSO control.

**Supplementary Table 3: Cholesterol uptake in Raw 264.7 Macrophage cells.**

| <b>Treatment</b> | <b>CPMA</b>        | <b>P value versus DMSO</b> |
|------------------|--------------------|----------------------------|
| <b>DMSO</b>      | 19824.69 +/-501.21 |                            |
| <b>9,11 CLA</b>  | 17474.36+/-526.77  | <i>P</i> =0.0091           |
| <b>10,12 CLA</b> | 17662.81+/-388.67  | <i>P</i> =0.0082           |
| <b>CLA Blend</b> | 18648.75+/-304.1   | <i>P</i> =0.0088           |

Cholesterol uptake in Raw 264.7 cells treated with h 25 $\mu$ M c9,t11-CLA, t10,c12-CLA, CLA blend (80:20 c-9t,11-CLA: and t10,c12-CLA), or DMSO for 24hours prior to addition 1 $\mu$ g/ml acLDL) and 1uCi/ml triitated cholesterol for 4 hours. Scintillation counts were used to measure cholesterol content in cells. Data are mean +/- SEM of 3 independent experiments. Statistical analyses were performed using *t*-test.

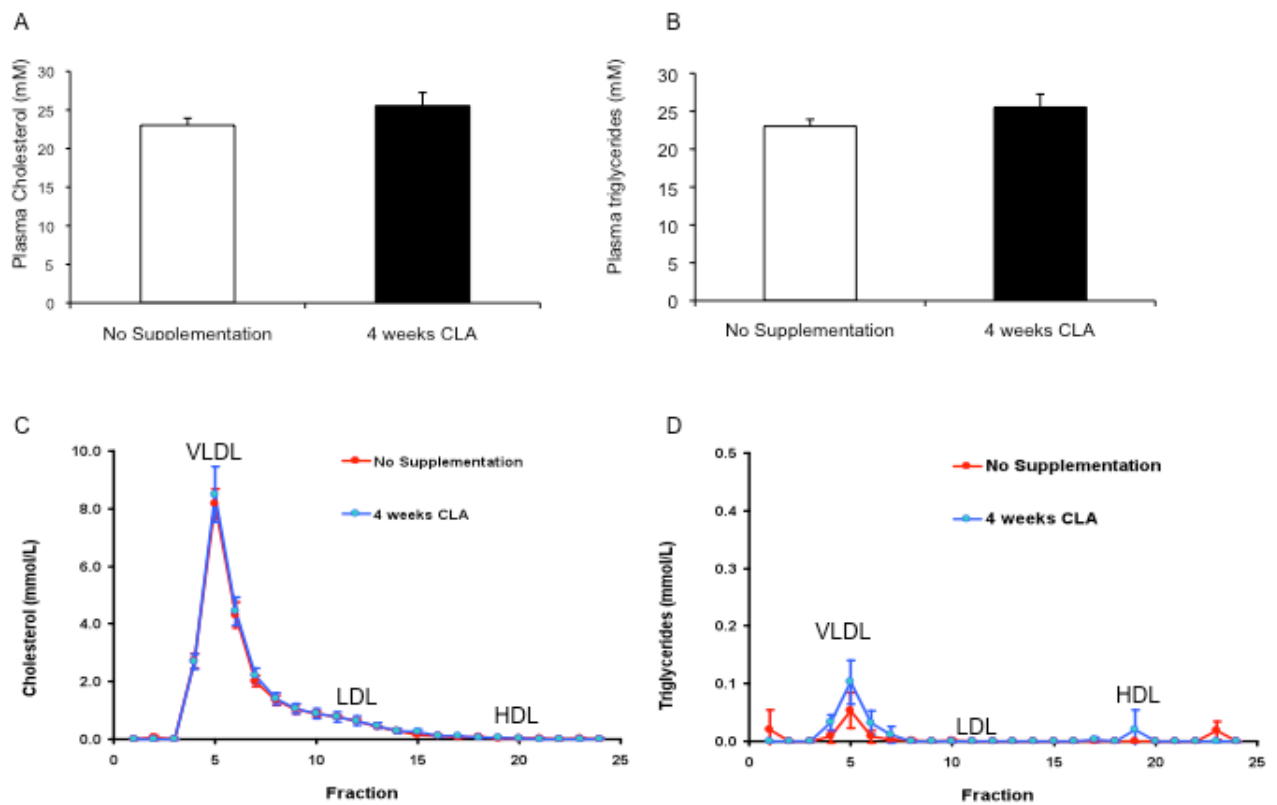

**Supplementary Figure 5. Quantification of plasma cholesterol and triglycerides in CLA-induced regression *in vivo*.** (A) Plasma cholesterol, (B) triglycerides and (C-D) mean FPLC lipoprotein profile analysis from apoE<sup>-/-</sup> mice fed a 1% cholesterol diet for 12 weeks with/without CLA supplementation for the final four weeks (n=3). All values are depicted as mean ± SEM.

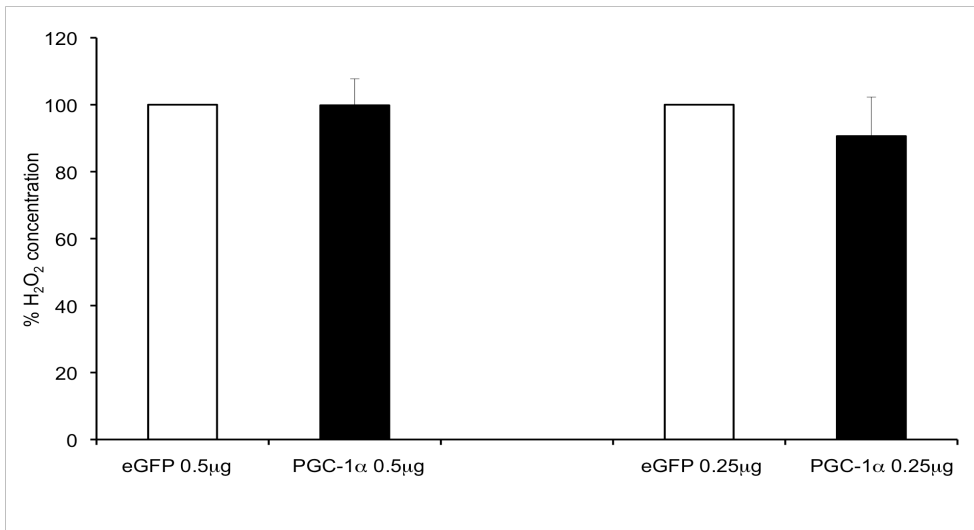

**Supplementary Figure 6. Measurement of intracellular Reactive Oxygen Species.**

Percentage H<sub>2</sub>O<sub>2</sub> concentration in RAW 264.7 macrophage cells transfected with 0.25µg or 0.5µg PGC-1α-GFP or eGFP. Data are mean +/- SEM and are representative of 5 independent experiments.

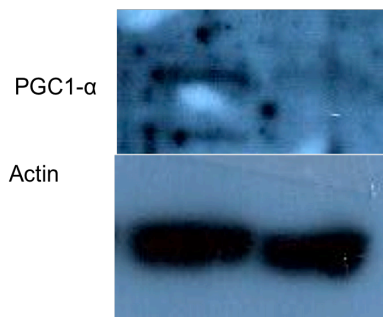

**Supplementary Figure 7.** Western blot analysis of PGC-1α expression in BMDMs from PGC-1α WT and KO animals.

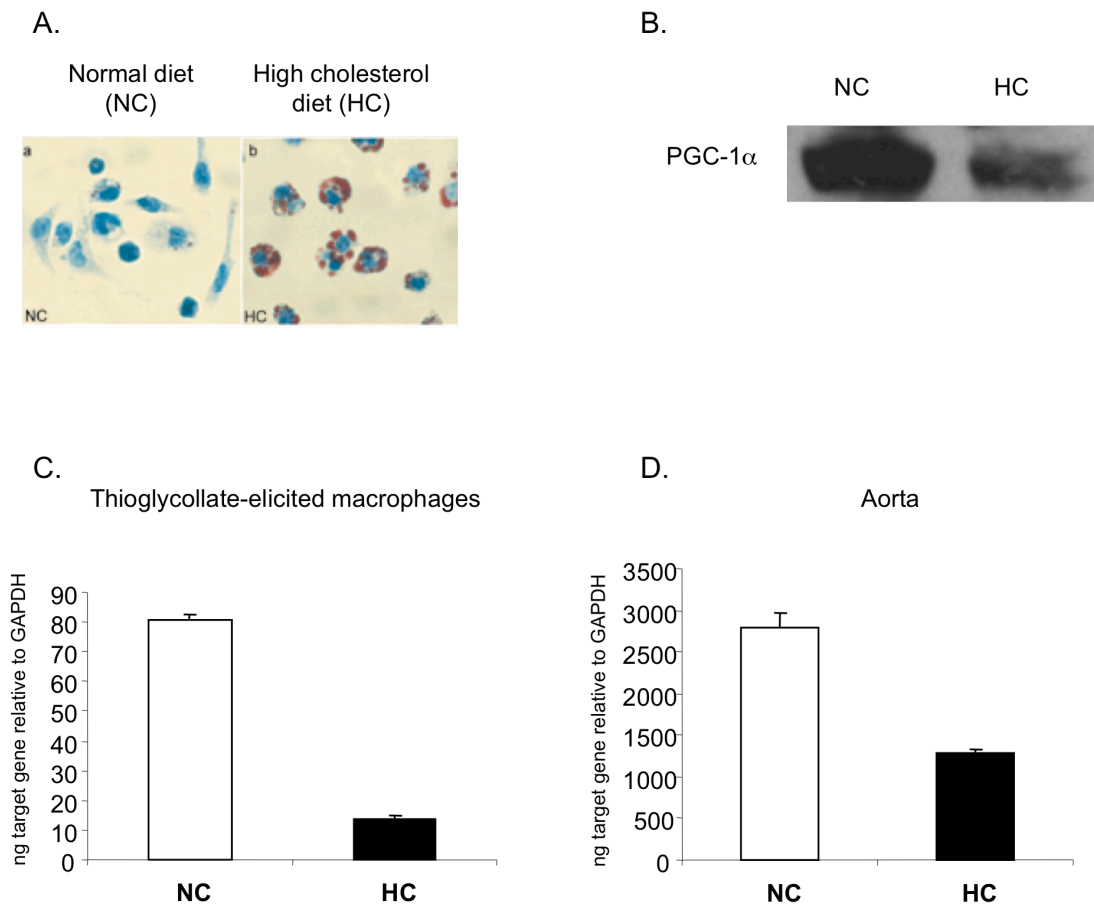

**Supplementary Figure 8. PGC-1 $\alpha$  protein and mRNA expression in peritoneal macrophage-derived foam cells and aorta from LDLR<sup>-/-</sup> mouse.** (A) Oil Red O staining of macrophages from LDLR<sup>-/-</sup> male mice fed a normal chow (NC) or a high cholesterol diet for 4 months (HC). (B) PGC-1 $\alpha$  protein levels measured by Western Blot and (C) PGC-1 $\alpha$  mRNA expression in thioglycollate-elicited macrophages from LDLR<sup>-/-</sup> mice fed a NC and HC mice. (D) PGC-1 $\alpha$  mRNA expression in aorta from LDLR<sup>-/-</sup> mice fed a NC and HC diet.

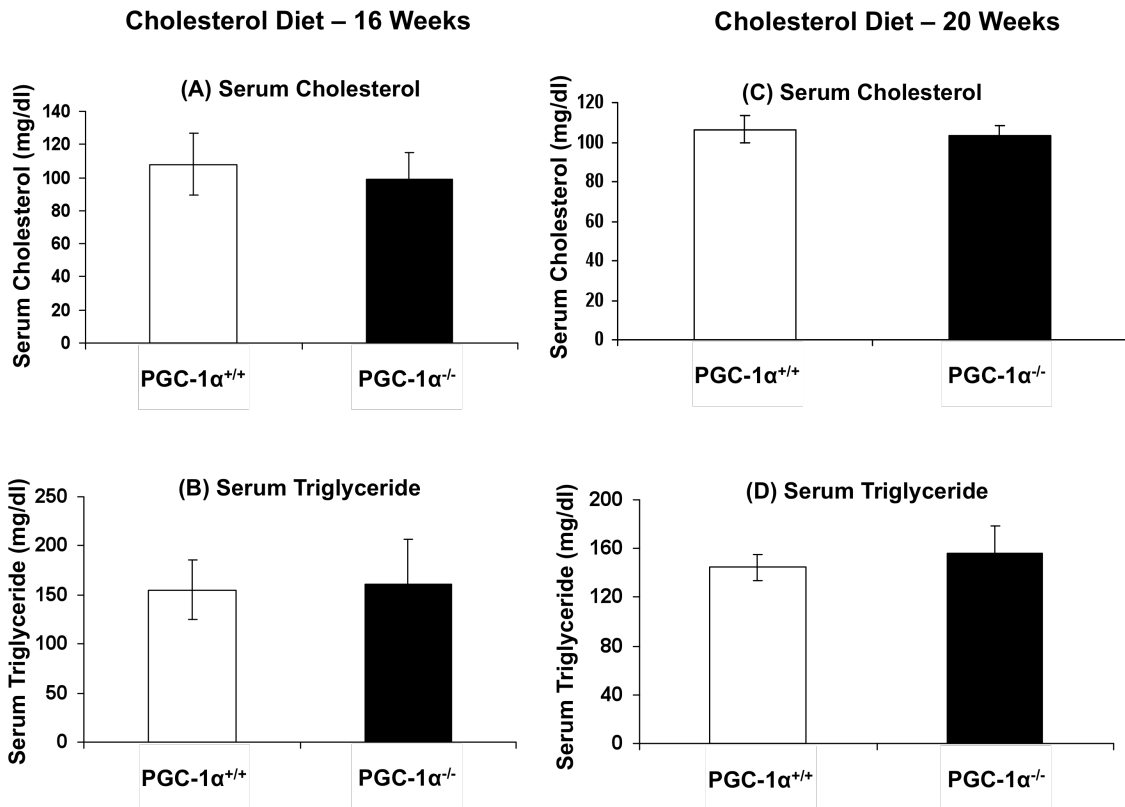

**Supplementary Figure 9A. Serum cholesterol and triglyceride levels in PGC-1 $\alpha^{+/+}$  and PGC-1 $\alpha^{-/-}$  mice on a high cholesterol diet**

Serum samples from PGC-1 $\alpha^{+/+}$  and PGC-1 $\alpha^{-/-}$  mice were analyzed for total cholesterol and triglyceride levels following either 16 or 20 week high cholesterol diet. Both genotypes showed similar concentrations of (A) serum cholesterol and (B) serum triglycerides after 16 weeks on diet. The results were similar in the 20 week fed groups with no difference in (C) serum cholesterol or (D) serum triglycerides.

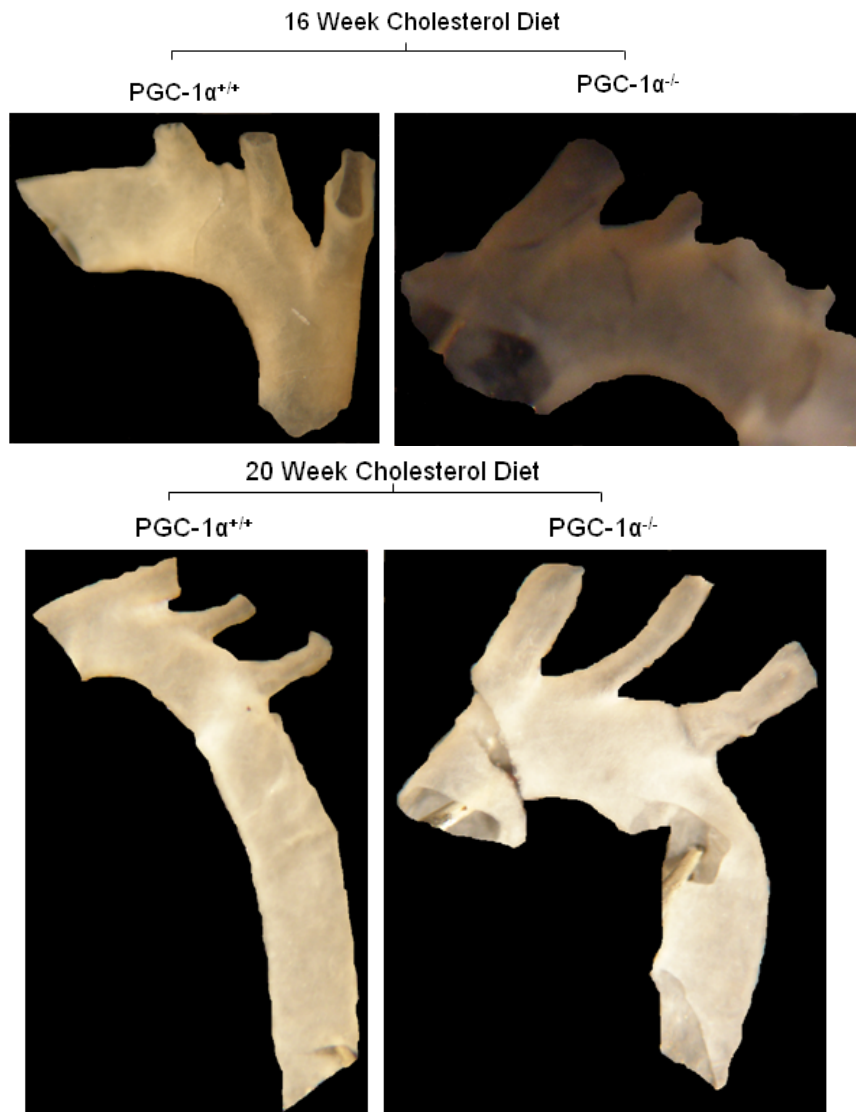

**Supplementary Figure 9B. No evidence of atherosclerotic lesion development in the isolated aorta of PGC-1 $\alpha^{+/+}$  or PGC-1 $\alpha^{-/-}$  mice on a high cholesterol diet**

The aortic root and arch was dissected from each mouse and *en face* analysis coupled with Oil Red O staining carried out to determine if lipid deposition had occurred. (A) Isolated aorta from 16 week cholesterol fed PGC-1 $\alpha$  mice showed no signs of lipid deposition or plaque formation in either genotype. (B) Aorta from 20 week cholesterol fed PGC-1 $\alpha$  also showed no signs of lipid deposition or plaque formation

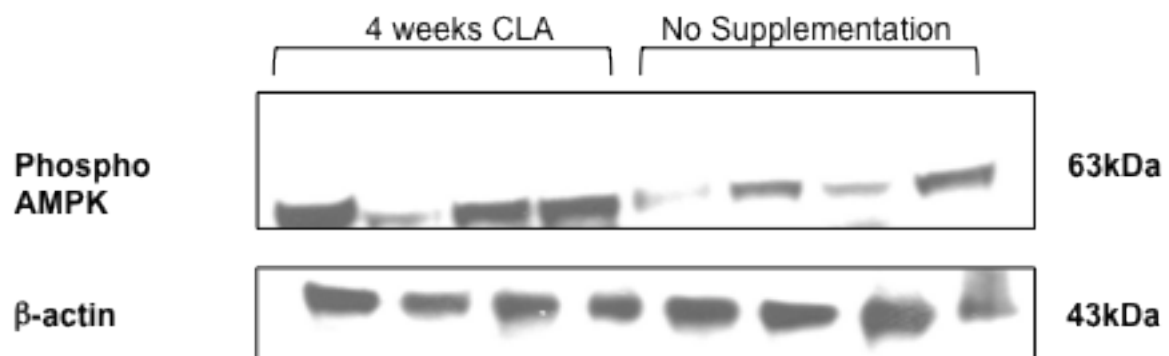

**Supplementary Figure 10. CLA increases AMPK phosphorylation *in vivo*.**

Western blot analysis of AMPK phosphorylation in murine aorta from apoE<sup>-/-</sup> mice that received a 1% cholesterol chow for 12 weeks (n=4) and those that received the same diet for 12 weeks where the final four weeks were supplemented with 1%CLA (n=4).  $\beta$ -actin was used as a loading control for Western blot analysis.



### **Supplementary Video Files 1 and 2**

The following video files (Quicktime movies) demonstrate a 3-dimensional co-localization of PGC-1 $\alpha$  with the macrophage marker F4/80 (murine aorta, video 1) or CD68 (human carotid artery, video 2). Tissue sections were imaged in an optimized 3D z-stack using confocal microscopy. Co-localization analysis using IMARIS software package generates an additional channel (grey), representing the co-localized voxels within the macrophage. Animated 3D renders were exported from IMARIS and assembled with Adobe After Effects CS4.

#### **Supplementary Video 1. Murine aorta PGC-1 $\alpha$ co-localization to macrophage cells.**

Murine aorta section immunofluorescently stained for macrophages with rat-anti-mouse-F4/80, followed by secondary anti-rat-IgG-Alexa-647 (red channel). Rabbit-anti-mouse-PGC-1 $\alpha$  staining, followed by secondary anti-rabbit-IgG-Alexa-546 (green channel). Co-localization of F4/80<sup>+</sup> macrophages and PGC-1 $\alpha$  are rendered in grey. DAPI stained nuclei are isosurfaced in blue.

#### **Supplementary Video 2. Human atherosclerotic plaque PGC-1 $\alpha$ co-localization to**

**macrophage cells.** Human carotid artery section immunofluorescently stained for macrophages with monoclonal mouse-anti-human-CD68, followed by secondary Alexa-594-goat-anti-mouse-IgG-F(ab')<sub>2</sub> fragment. Polyclonal rabbit-anti-human-PGC-1 $\alpha$  staining, followed by secondary Alexa-647 goat-anti-rabbit-IgG. Co-localization of CD68<sup>+</sup> macrophages and PGC-1 $\alpha$  are rendered in grey. DAPI stained nuclei are isosurfaced in blue.

#### **Supplementary Video 3. oxLDL flux in PGC-1 $\alpha$ – GFP transfected RAW macrophages.**

Time lapse imaging of GFP-PGC-1 $\alpha$  transfected macrophages (green) and non transfected macrophages treated with oxLDL for four hours. In non-transfected cells oxLDL uptake and

accumulation is visible and the cells increase in size. In the GFP positive cells there is no oxLDL accumulation in the cells and the cell maintain their phenotype.

## **Supplementary Methods**

All reagents used in this study were of the highest purity and unless otherwise stated, were obtained from Sigma-Aldrich (Dorset, UK).

### ***Immunohistochemical and Western Blot Analysis of Murine Aorta and Human***

#### ***Atherosclerotic Plaque***

For murine aortic tissue and human atherosclerotic plaque, 30µg of total protein was separated by SDS-PAGE under reducing conditions, followed by electrophoretic transfer of the proteins to nitrocellulose membrane. Antibodies used were polyclonal rabbit Anti-PGC1α (1:500, Calbiochem) for human and murine samples, polyclonal rabbit Anti-UCP-1 (1:1000, Calbiochem), monoclonal mouse CYP7B1 (1:500, Abnova), monoclonal mouse β-actin (1:500, Santa Cruz, Germany) for murine samples. For immunohistochemistry analysis 5µm serial paraffin-embedded aortic sections were incubated with PGC-1α (1:1000), or the macrophage marker F4/80 (1:50) (Abcam Cambridge, MA) overnight at 4°C.

#### ***Quantification of PGC-1α expression in human atherosclerotic plaque***

The Aperio Software Analysis System *Nuclear Analysis* algorithm was applied to quantify the level of PGC-1α expression per cell and then the total of PGC-1α positive cells per tissue section. Nuclear analysis was then carried out on stained sections to establish the target protein expression firstly, as “expression per cell”, and then as “a total per tissue section. This algorithm evaluated the intensity of DAB staining (protein staining) in each Haematoxylin (nuclei) stained cell and specifically and unequivocally assigned a mark-up image composed of different colours, corresponding with different levels of protein expression, which was counted and quantified. The algorithm used is outlined in the figure below.

### Aperio Nuclear Analysis Algorithm

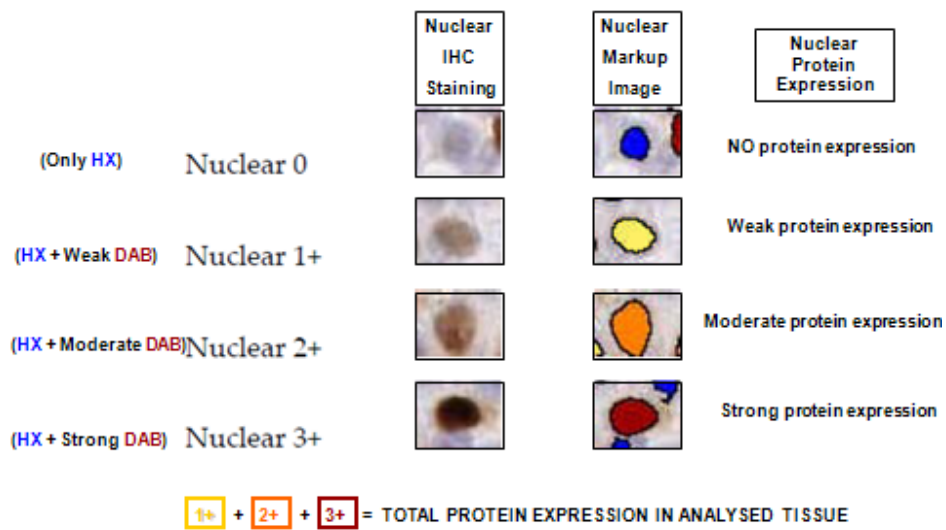

**Supplementary Figure 11. Algorithm used in quantification of PGC-1 $\alpha$  expression.** The left panel demonstrates the intensity of the immunostaining. The right panel shows the corresponding mark-up image relative to the intensity of the staining and protein expression.

### ***Cell Culture***

The murine macrophage cell line RAW 264.7 was purchased from the LGC Promochem (Middlesex, UK) and cultured in Dulbeccos Modified Eagles Media (modified DMEM) supplemented with 10% fetal bovine serum and antibiotics (100 U/mL penicillin, 100 µg/mL streptomycin). Cells were grown in a humidified atmosphere of 5% CO<sub>2</sub>/95% air at 37°C and sub-cultured every two days by gentle scraping. RAW 264.7 macrophages were treated for 24hrs with 25µM c9,t11-CLA, t10,c12-CLA, CLA blend (80:20 c-9t,11-CLA: and t10,c12-CLA), oleic acid (OA)-or DMSO in 1000µL of modified DMEM containing 1% serum. Post treatment cells were exposed to 50µg/ml oxidised LDL (ox-LDL) (Intracel, DC, USA), either non-labelled ox-LDL RP-047, or Dil labelled RP-177 (Dil ox-LDL) for 4 hrs.

### ***RNA isolation and Real Time PCR***

Following CLA treatments and incubation with ox-LDL Raw 264.7, RNA was extracted using the RNeasy mini-kit (Qiagen). Reverse transcription was carried out using reverse transcriptase (Promega) according to the manufacturers instructions. Quantification of PGC-1α, UCP-1, PPARγ and Cyp7b1 gene expression by Real-Time PCR was performed on an optical-grade 384-well plate platform using a fluorescence-based, real-time detection method (ABI Prism 7700 Sequence Detection System, Applied Biosystems). RNA was extracted from aortic tissue of apoE<sup>-/-</sup> mice by homogenising tissue samples under liquid nitrogen. RNA was isolated using Trizol (Invitrogen, Bio-Sciences, Dublin) and further purified using RNeasy kit (Qiagen, UK). Protein was extracted using Tissue Protein Extraction Reagent (T-PER) (Fisher Scientific, Dublin). mRNA expression of PGC-1α, CPT-1, PPARγ and Cyp7b1 was performed as above.

### ***Primer sequences for real time PCR analysis and PGC-1 $\alpha$ Genotyping***

#### SYBR Green Primers (MOUSE)

1. UCP1      FWD: CCTGCCTCTCTCGGAAACAA  
                  REV: TGTAGGCTGCCCAATGAACA
  
2. Cyp7b1    FWD: GCCGATTATCAGCGAAAGCC  
                  REV: GTGATTTTTAGCAGTTGGGAC
  
3. SRA1      FWD: GGGCCATTTTTAGTGCTGTGA  
                  REV: TCCTGGTGCTCCTGGGTTT

#### PGC-1 $\alpha$ Genotyping Primers (MOUSE):

- HET FWD:    CCAGTTTCTTCATTGGTGTG  
HET REV:    ACCTGTCTTTGCCTATGATTC  
KO FWD:     TCCAGTAGGCAGAGATTTATGAC  
KO REV:     CCAACTGTCTATAATTCCAGTTC

### ***Flow cytometry***

Cells were resuspended in 1ml PBS and Dil ox-LDL uptake was assessed by flow cytometry (Coulter EPICS XL-MCL). Forward and side scatter gates were established to exclude non-viable cells and cell debris from the analysis. Fluorescence signals from the accumulated Dil associated with the cells were detected at 555–600 nm by a photomultiplier and then converted to digital format and processed. The mean fluorescence intensity of  $1.5\text{-}3 \times 10^4$  cells were analysed in each sample. Auto-fluorescence signals generated by unlabelled cells were used as negative controls in each experiment.

### ***Cholesterol Uptake Assay***

RAW 264.7 macrophages were plated at a density of  $1.5 \times 10^5$  cells/well in a 12 well plate and incubated overnight. Cells were subsequently treated for 24hrs with 25 $\mu$ M c9, t11-CLA, t10, c12-CLA, CLA blend (80:20 c-9t, 11-CLA: and t10, c12-CLA), oleic acid (OA), linoleic acid (LA) (Cayman Chemicals, MI, USA) or DMSO in 1000 $\mu$ L of modified DMEM. Cells were washed twice prior to addition of DMEM containing 50 $\mu$ g/ml acLDL (Invitrogen) and 1 $\mu$ Ci/ml tritiated cholesterol (Perkin Elmer). Cells were loaded for 4 hrs. Isopropanol (Sigma-Aldrich) was used to extract lipids, which were dissolved in toluene (Sigma-Aldrich). Scintillation counts were determined using TriCarb 2900Tr Liquid Scintillation (Packard).

### ***Cholesterol efflux Assay***

To cholesterol-label macrophages, media containing 1% FBS, [ $^3$ H] cholesterol (1 $\mu$ Ci/ml) and acLDL (25 $\mu$ g protein/ml) was added to the cells for 48 hrs. RAW 264.7 macrophages were incubated in media containing 0.2% BSA for 24 hrs to allow cellular cholesterol radiolabel to equilibrate. During the equilibration period cells were treated with 25 $\mu$ M CLA isomers or CLA blend, oleic acid, or DMSO. Time zero cells were harvested to determine total counts/min (cpm), in the cells before adding the extracellular cholesterol acceptors.

Media containing HDL (20 $\mu$ g/ml) or apoA-I (25 $\mu$ g/ml), 2% serum, or media alone was added for up to 4 h. [ $^3$ H]-Sterols in the media were compared to total [ $^3$ H] at time zero to determine the percent release of [ $^3$ H] cholesterol.

### ***Plasma cholesterol, triglyceride and lipoprotein analysis***

Mice were fasted for 4 hours, blood was collected, followed by centrifugation to isolate plasma. Total plasma cholesterol and triglycerides were measured using Cholesterol CHOD-PAP and Triglycerides GPO-PAP kits respectively (Roche, Mannheim, Germany). For lipoprotein analysis, lipoproteins were separated by fast protein liquid chromatography using an AKTA apparatus (column: Superose<sup>TH</sup> 6PC3.2/30). Cholesterol and triglycerides were measured in the collected fractions using the previously described kits. Measurement of lipoprotein profiles was conducted by TNO Biosciences, Leiden, The Netherlands.
